# Supplementary material
Source: Springer Nature journal article supplement (https://www.springermedizin.de/resource/supplementary/13048_2010_36_MOESM2_ESM.pdf/9664812)

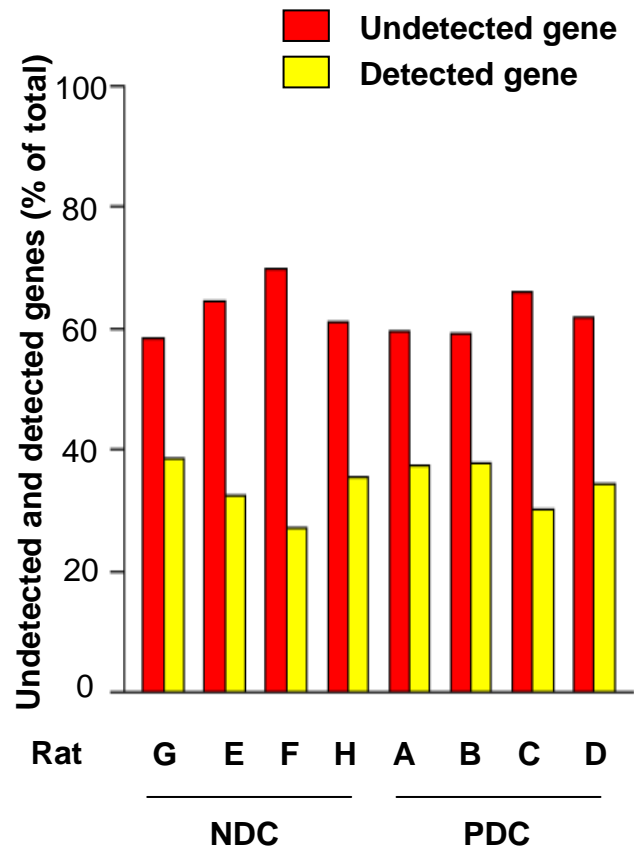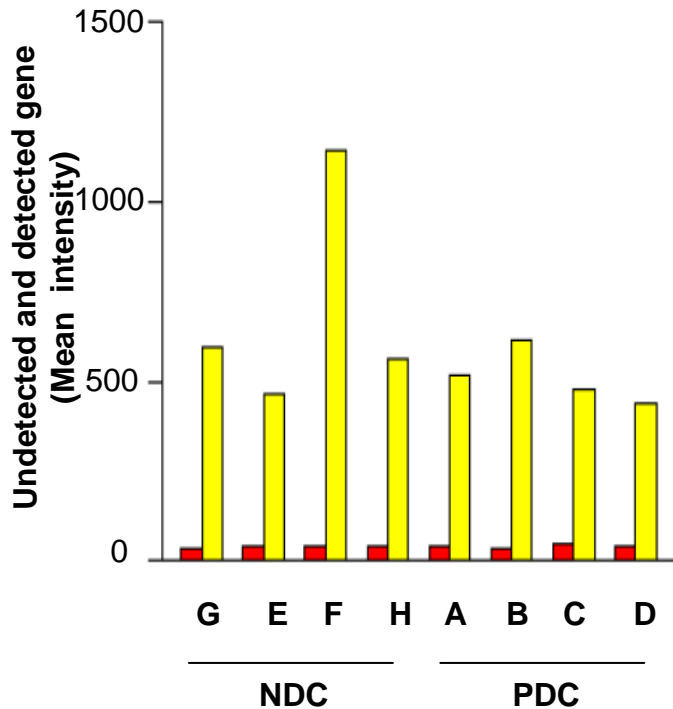

Supplement: MOESM2 [file 9664812]
